# Supplementary material
Source: PubMed Central journal article supplement (PMC7497629)
Supplement: am0c09364_si_001.pdf [file am0c09364_si_001.pdf]

# Antibody-enabled antimicrobial nanocapsules for selective elimination of *Staphylococcus aureus*

*Kristina Ivanova,<sup>1</sup> Aleksandra Ivanova,<sup>1</sup> Eva Ramon,<sup>1</sup> Javier Hoyo,<sup>1</sup> Susana Sanchez-Gomez,<sup>2</sup>  
Tzanko Tzanov<sup>1\*</sup>*

1) Grup de Biotecnologia Molecular i Industrial, Department of Chemical Engineering,  
Universitat Politècnica de Catalunya, Rambla Sant Nebridi 22, 08222, Terrasa, Spain

2) Bionanoplus S.L., Pol. Mocholi, Plaza Cein 5, nave B14, 31110, Noain, Spain

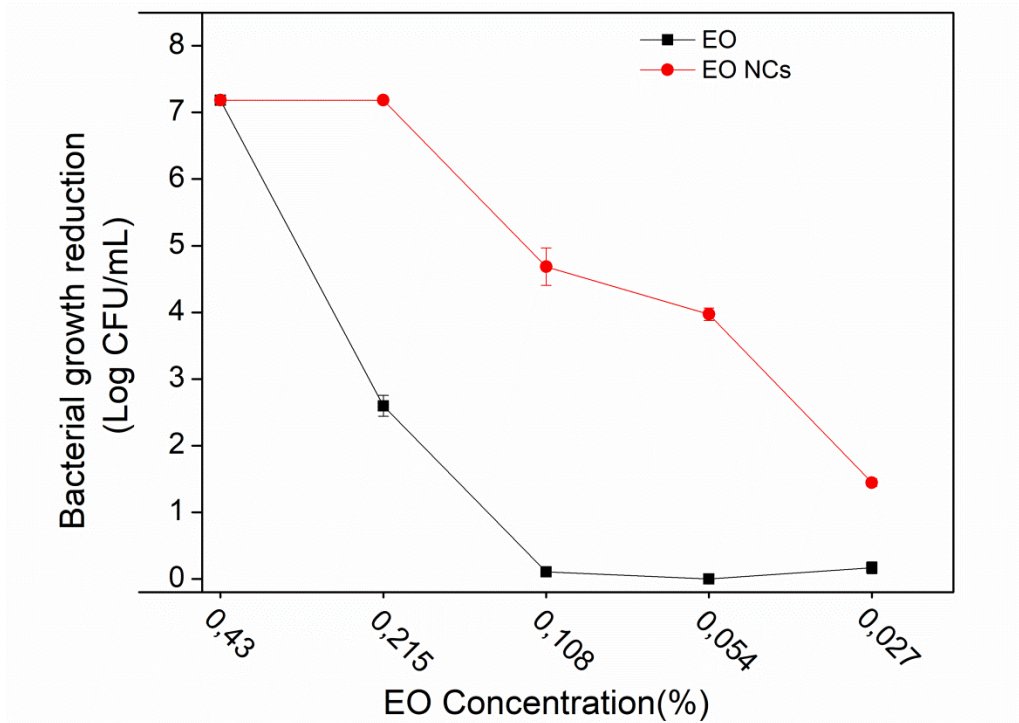

**Figure S1.** *S. aureus* growth reduction after 24 h incubation with free (black lines) and encapsulated EO (red lines) at different concentrations. The EO encapsulation led to enhanced antibacterial efficacy against *S. aureus* at lower amounts, when compared to the same amount of pristine oil.

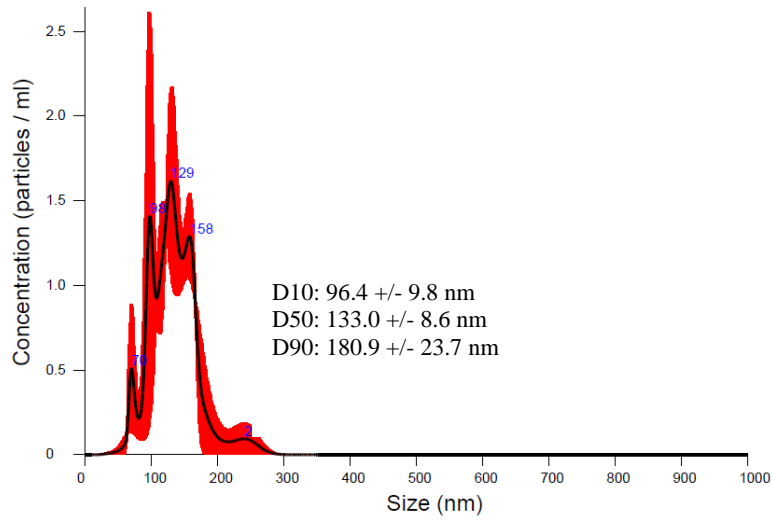

**Figure S2.** Nanoparticle tracking analysis of Ab@EO NCs.

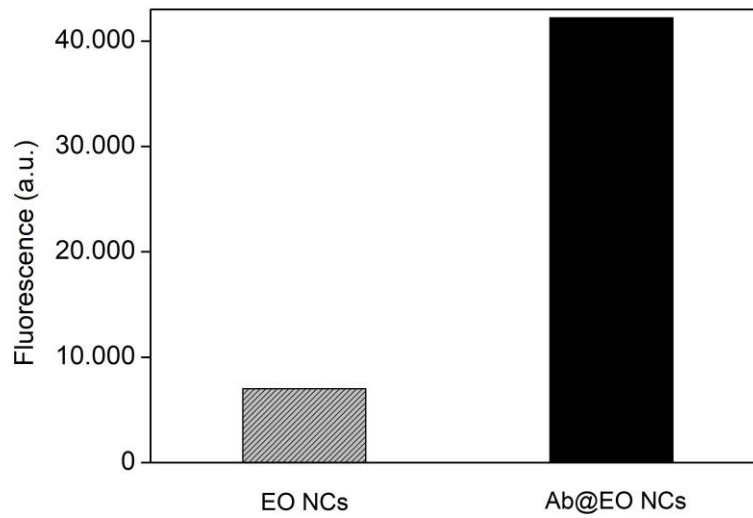

**Figure S3.** Fluorescent intensity measurement at  $\lambda_{exc}/\lambda_{em} = 490/525$  nm upon FITC-protein A binding with the Ab@EO NCs.

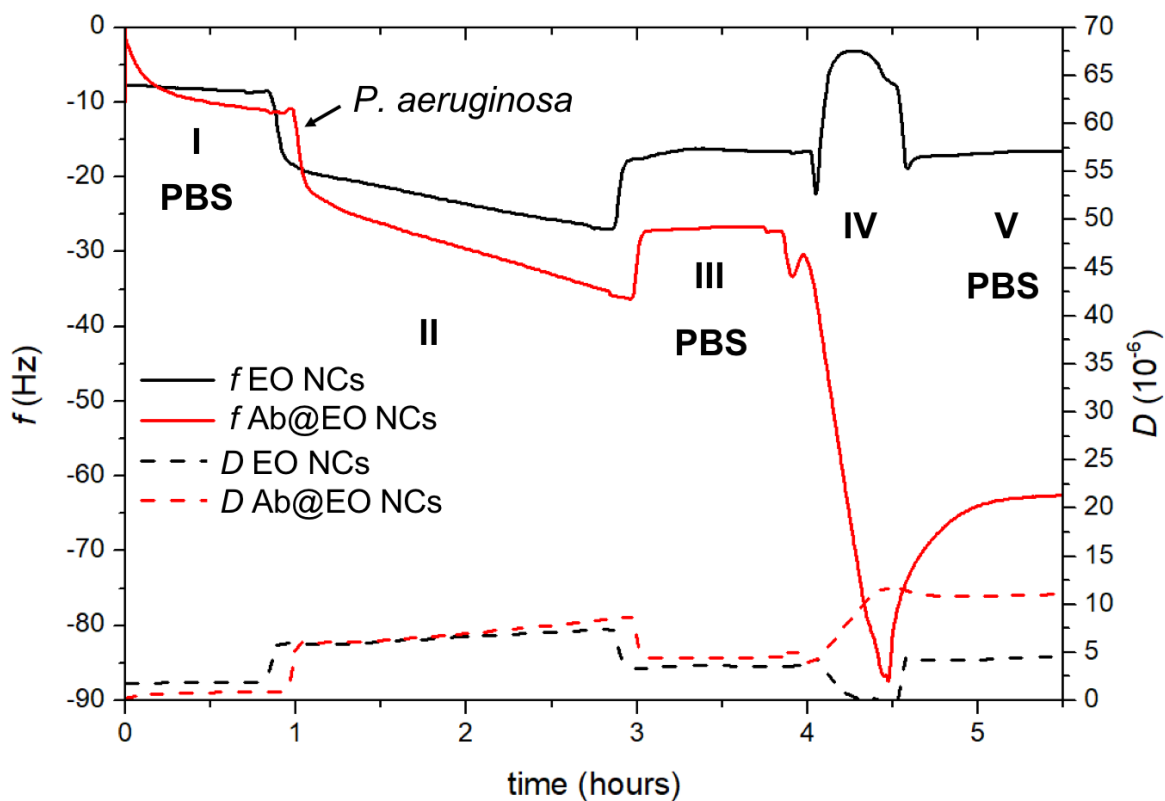

**Figure S4.** Interaction of EO NCs and Ab@EO NCs with *P. aeruginosa* assessed by QCM-D. The shift in the frequency and dissipation are represented with solid and dashed lines, respectively. The numbers I, II, III, IV and V indicate the different zones, respectively the baseline with PBS, bacterial adhesion, baseline after washing of loosely adherent cells, NCs insertion and PBS washing.

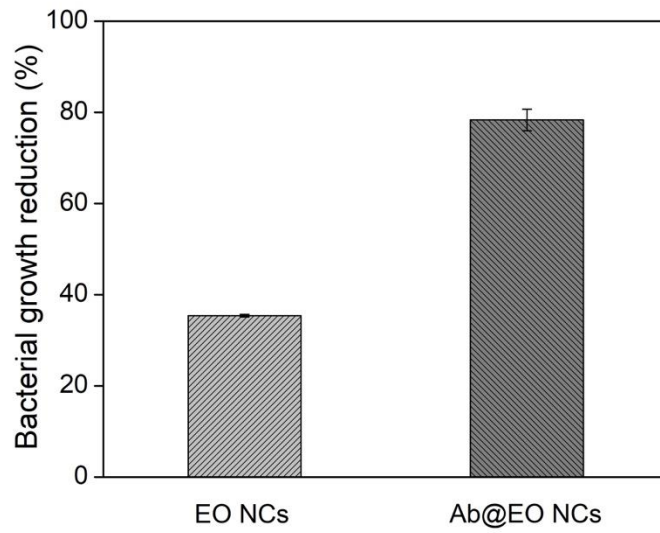

**Figure S5.** *S. aureus* growth reduction in an *in vitro* co-culturing model with human cells after treatment with EO and Ab@EO NCs.

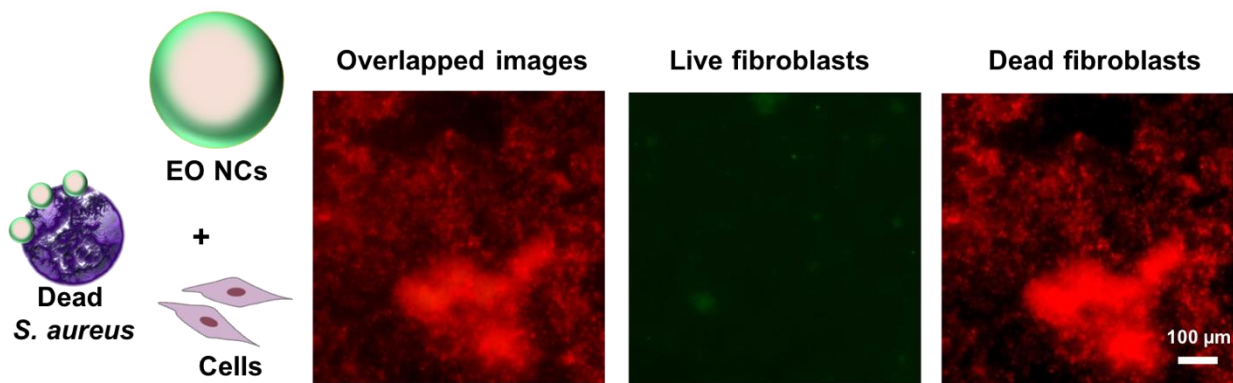

**Figure S6.** Live/Dead kit staining of *S. aureus* infected human cells treated with EO NCs.
